# Supplementary material for: Differential impact of ubiquitous and muscle dynamin 2 isoforms in muscle physiology and centronuclear myopathy
Source: PubMed Central journal article supplement (PMC9652393; doi:10.1038/s41467-022-34490-4), 2022-11-11

## Description of Additional Supplementary Files

**Supplementary Movie 1.** 4-week-old, WT,  $Mtm1^{-/y}$ ,  $Mtm1^{-/y} Dnm2ex12b^{+/-}$  in a cage.

Starting position of the mice for video 1:

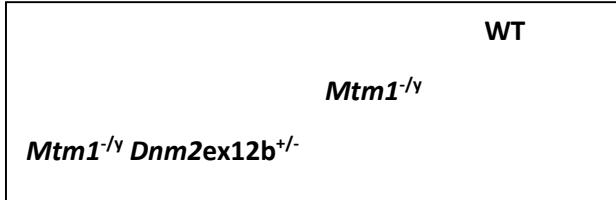

**Supplementary Movie 2.** 4-week-old,  $Dnm2ex12b^{+/-}$ ,  $Mtm1^{-/y}$ ,  $Mtm1^{-/y} Dnm2ex12b^{+/-}$  in a cage.

Starting position of the mice for video 2:

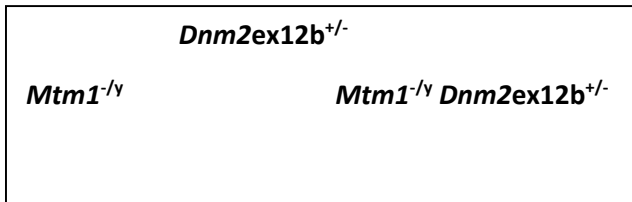

**Supplementary Movie 3.** 4-week-old  $Mtm1^{-/y}$ ,  $Mtm1^{-/y} Dnm2ex12b^{+/-}$  on a grid.

Starting position of the mice for video 3:

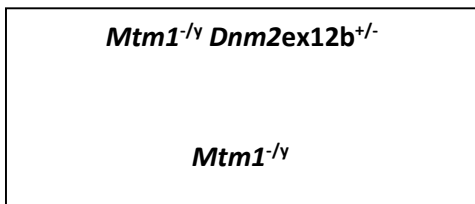

Supplement: 41467_2022_34490_MOESM3_ESM.pdf [file 41467_2022_34490_MOESM3_ESM.pdf]
